# Supplementary material
Source: PubMed Central journal article supplement (PMC6530988)

**Pedigree #**

**HVS1**

**Haplogroup**

5  
5  
5  
5  
5  
5  
5  
5  
5  
5  
5

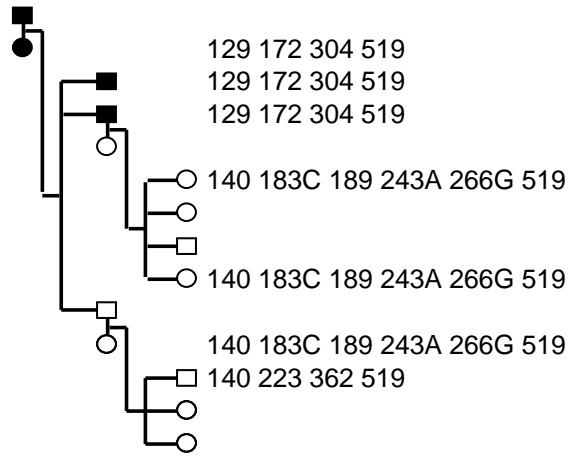

F1a  
F1a  
F1a  
B5  
B5  
B5  
D or G

6  
6  
6  
6  
6  
6  
6  
6  
6  
6  
6  
6  
6  
6  
6  
6  
6  
6  
6  
6  
6  
6  
6  
6  
6

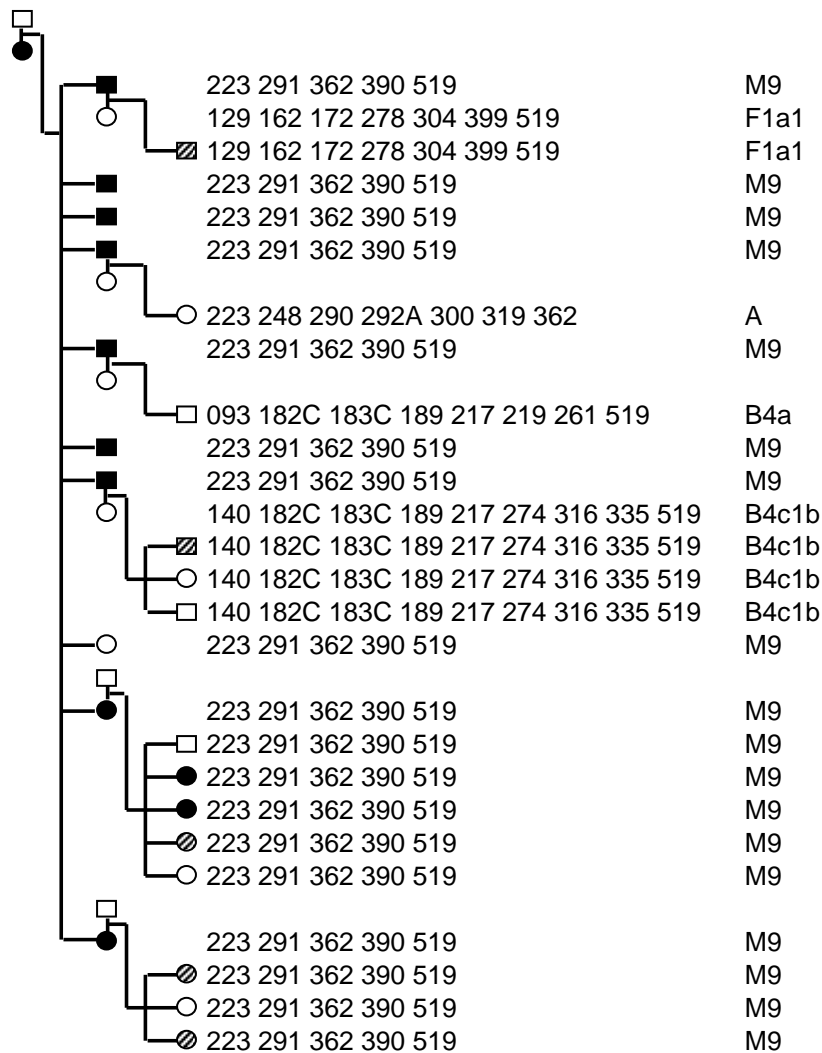

M9  
F1a1  
F1a1  
M9  
M9  
M9  
A  
M9  
B4a  
M9  
M9  
B4c1b  
B4c1b  
B4c1b  
B4c1b  
M9  
M9  
M9  
M9  
M9  
M9  
M9  
M9  
M9

**Pedigree #**

**HVS1**

**Haplogroup**

7  
7  
7  
7  
7  
7  
7

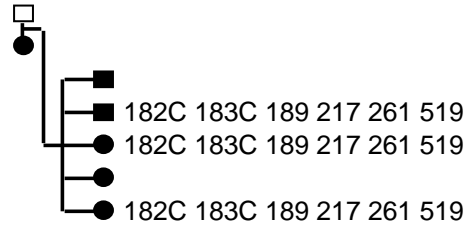

B4a  
B4a  
B4a

8  
8  
8  
8  
8  
8  
8  
8  
8

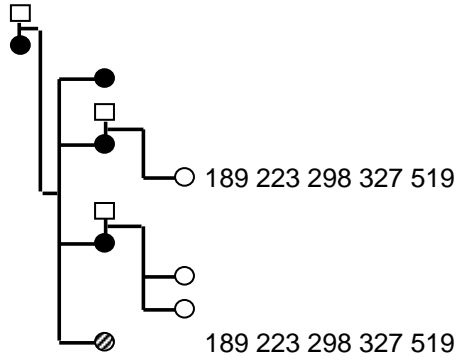

C  
C

9  
9  
9  
9  
9  
9  
9  
9  
9  
9  
9  
9  
9

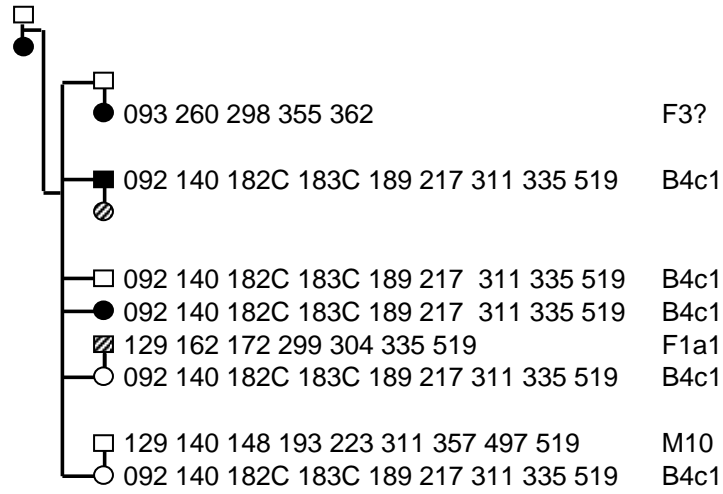

F3?  
B4c1  
B4c1  
B4c1  
B4c1  
B4c1  
M10  
B4c1

10  
10  
10  
10  
10

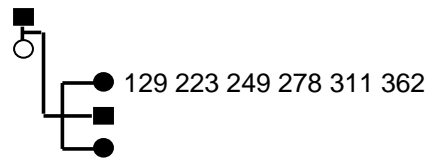

G

**Pedigree #**

**HVS1**

**Haplogroup**

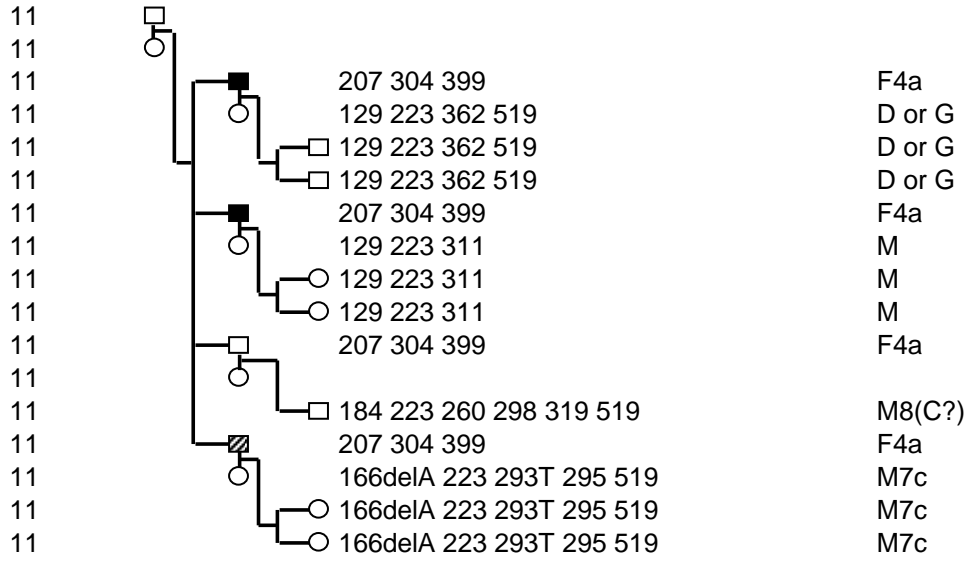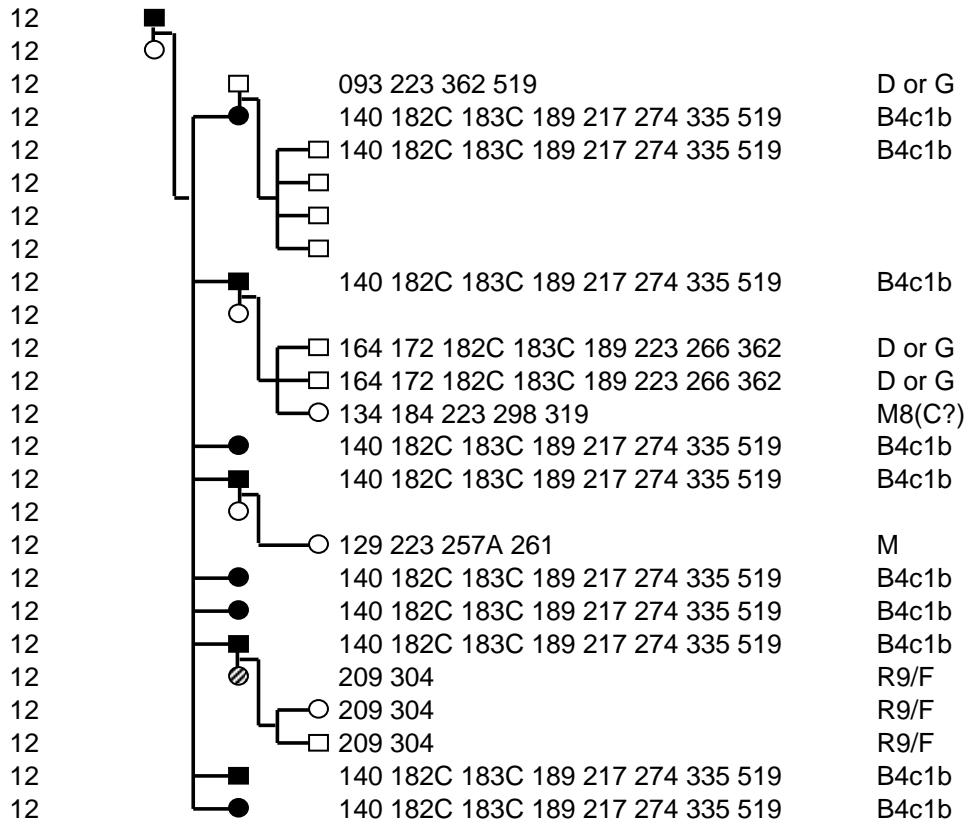



| Pedigree # | HVS1                            | Haplogroup |
|------------|---------------------------------|------------|
| 17         |                                 |            |
| 17         |                                 |            |
| 17         |                                 |            |
| 17         | 124 223 290 319 519             | A          |
| 17         | 124 223 290 319 519             | A          |
| 17         | 124 223 290 319 519             | A          |
| 17         | 126 223 235 290 319 502 519     | A          |
| 17         | 124 223 290 319 519             | A          |
| 17         | 124 223 290 319 519             | A          |
| 17         | 124 223 290 319 519             | A          |
| 17         | 124 223 290 319 519             | A          |
| 17         | 124 223 290 319 519             | A          |
| 17         | 140 174 183C 189 243 311het 519 | B5b        |
| 17         | 140 174 183C 189 243 519        | B5b        |
| 17         | 140 174 183C 189 243 311het 519 | B5b        |
| 17         | 124 223 290 319 519             | A          |
| 17         | 129 162 172 304 335 519         | F1a1       |
| 17         | 129 162 172 304 335 519         | F1a1       |
| 17         | 183C 189 223 362                | D5,6       |
| 17         | 124 223 290 319 519             | A          |
| 17         |                                 |            |
| 17         | 124 223 290 319 519             | A          |
| 17         | 129 223 257A 261                | M          |
| 17         |                                 |            |
| 18         |                                 |            |
| 18         |                                 |            |
| 18         | 126 231 266 319 399 519         | Y          |
| 18         | 124 223 256 290 295 319 362     | A          |
| 18         | 148 182C 183C 189 223 362 519   | D5,6       |
| 18         | 126 231 266 319 399 519         | Y          |
| 18         | 126 231 266 319 399 519         | Y          |
| 18         | 172 183C 189 304 355 519        | F1         |
| 18         |                                 |            |
| 18         | 148 182C 183C 189 223 362 519   | D5,6       |
| 18         | 183C 189 300 304 311 519        | F1         |
| 18         | 126 231 266 319 399 519         | Y          |
| 18         |                                 |            |
| 19         | 092A 291 304                    | F2         |
| 19         |                                 |            |
| 19         | 129 223 249 362 519             | D or G     |
| 19         | 129 223 249 362 519             | D or G     |
| 19         | 189 274 284 300 304 311 519     | F1         |
| 19         | 189 274 284 300 304 311 519     | F1         |
| 19         | 189 274 284 300 304 311 519     | F1         |
| 19         | 189 274 284 300 304 311 519     | F1         |
| 19         | 189 274 284 300 304 311 519     | F1         |
| 19         | 129 223 249 362 519             | D or G     |
| 19         | 129 223 249 362 519             | D or G     |
| 19         | 129 223 249 362 519             | D or G     |

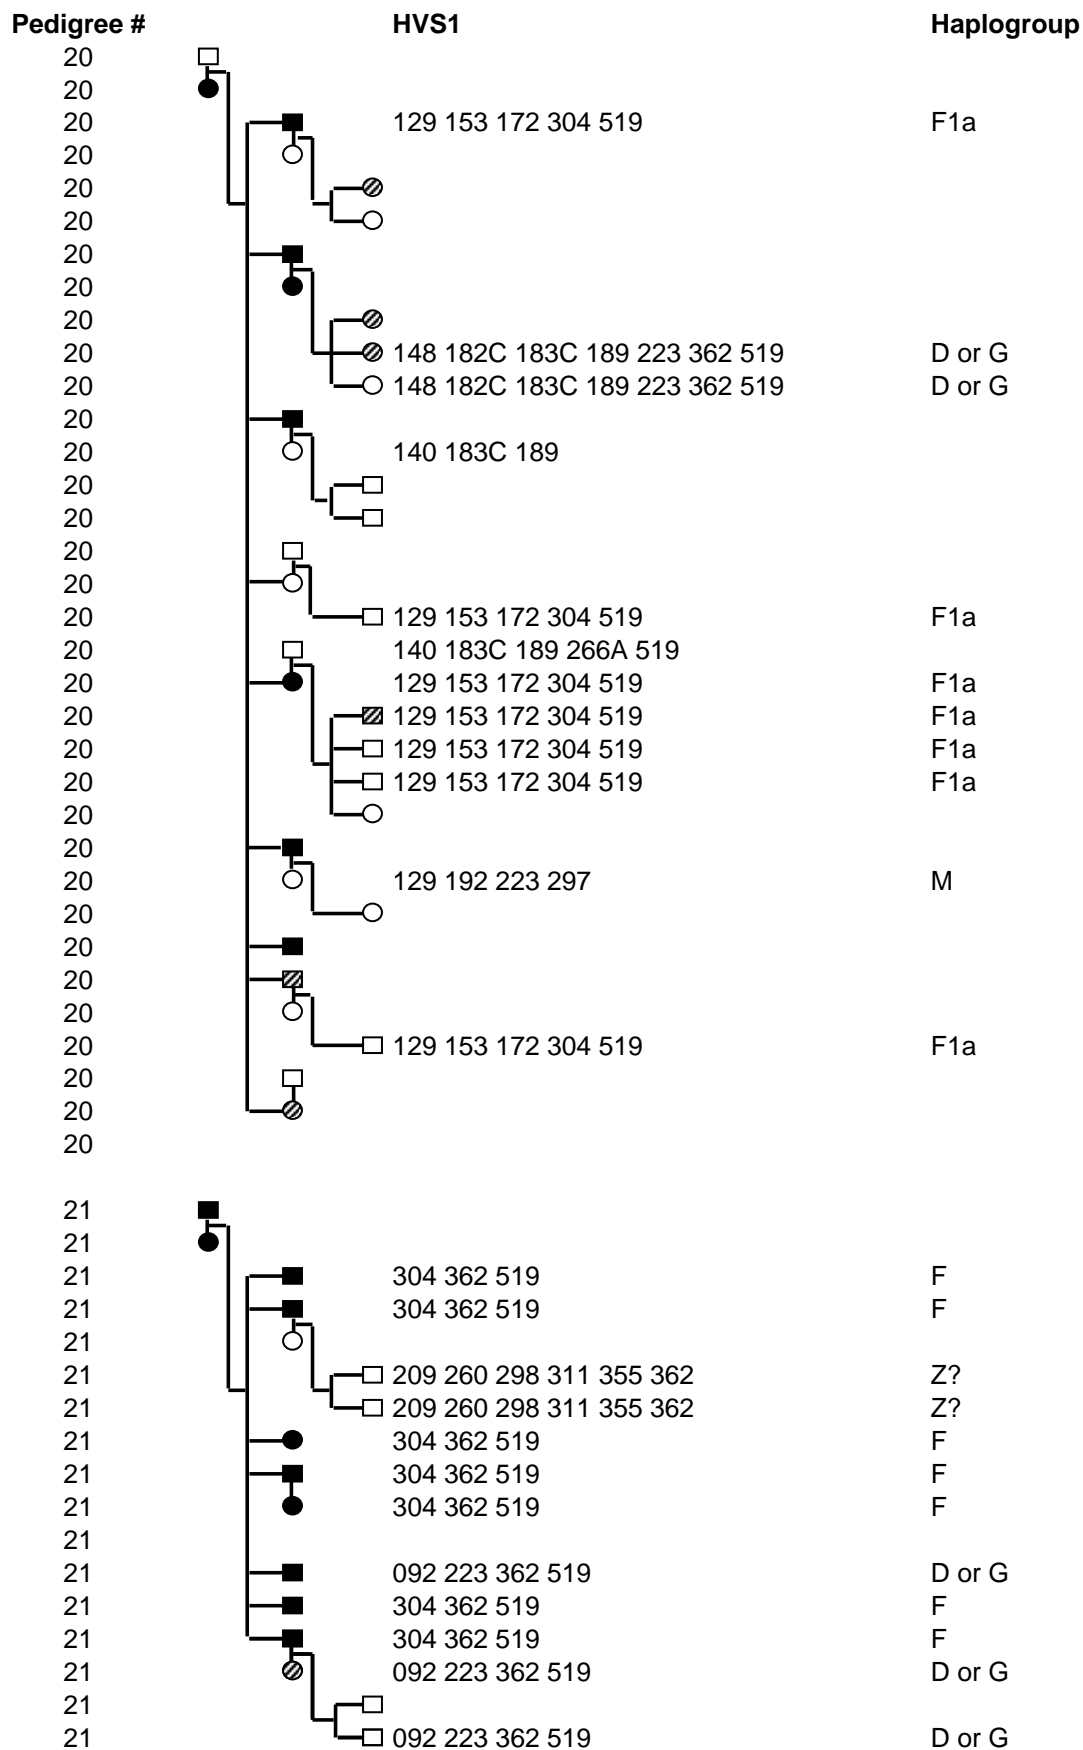

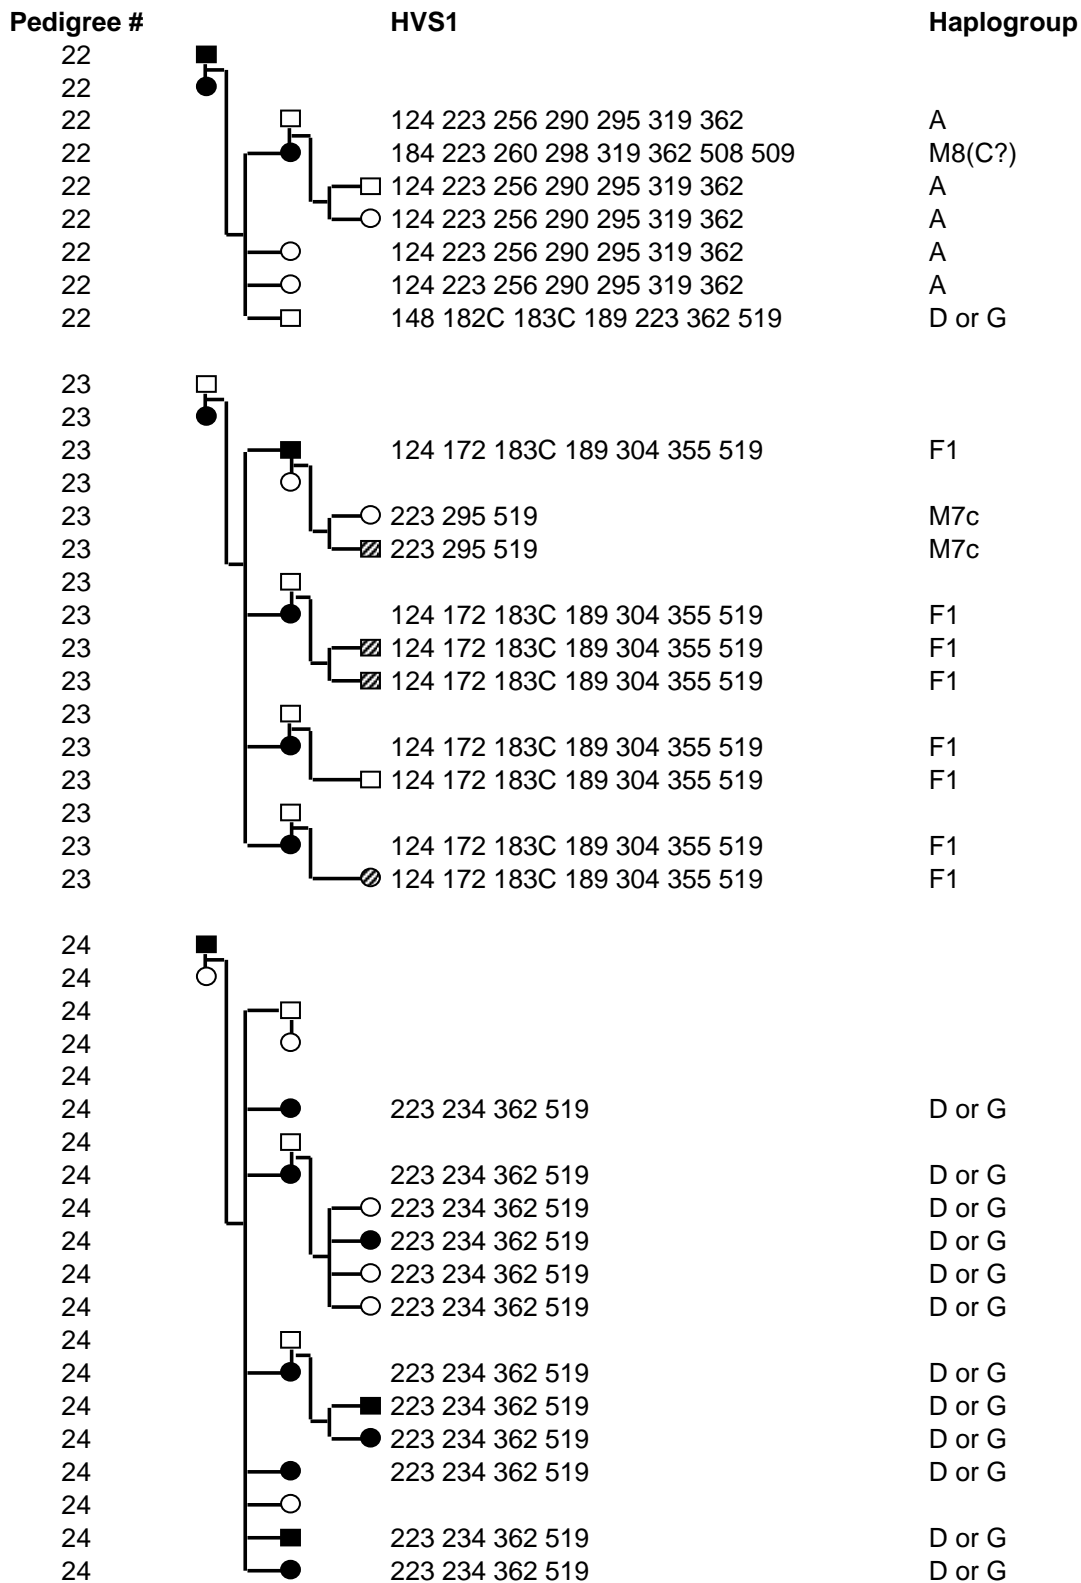

Supplement: NIHMS1014168-supplement-Fig_S1.pdf [file NIHMS1014168-supplement-Fig_S1.pdf]
