# Supplementary material
Source: PubMed Central journal article supplement (PMC6530988)
Supplement: NIHMS1014168-supplement-Table_S16.pdf [file NIHMS1014168-supplement-Table_S16.pdf]

Table S16

| #  | Fragment | Code (1)  | Length (2) | Tm (3) | Sequence (5'-3')       |
|----|----------|-----------|------------|--------|------------------------|
| 1  | 7, 8     | hmtH112   | 20(10/10)  | 65.8   | ACAGATACTGCGACATAGGG   |
| 2  | 8, 1     | hmtL569   | 20(10/10)  | 65.8   | AACCAAACCCCAAAGACACC   |
| 3  | 8, 1     | hmtH626   | 20(10/10)  | 65.8   | TTTATGGGGTGATGTGAGCC   |
| 4  | 1        | hmtL1305  | 19(8/11)   | 65.8   | GTAAGCGCAAGTACCCACG    |
| 5  | 1        | hmtH1405  | 20(10/10)  | 65.8   | ATCCACCTTCGACCCTTAAG   |
| 6  | 1        | hmtL2070  | 20(10/10)  | 65.8   | AATTTGCCACAGAACCCTC    |
| 7  | 1        | hmtH2174  | 20(10/10)  | 65.8   | ATTGGTGGCTGCTTTTAGGC   |
| 8  | 1, 2     | hmtL2797  | 21(11/10)  | 67.3   | GTCCTAAACTACCAAACCTGC  |
| 9  | 1, 2     | hmtH2941  | 21(11/10)  | 67.3   | GACTCTAGAATAGGATTGCGC  |
| 10 | 2        | hmtL3568  | 20(10/10)  | 65.8   | CGCTCTTCTACTATGAACCC   |
| 11 | 2        | hmtH3733  | 20(10/10)  | 65.8   | ATGATGGCTAGGGTGACTTC   |
| 12 | 2        | hmtL4322  | 21(12/9)   | 65.8   | ATAATAGGAGCTTAAACCCCC  |
| 13 | 2        | hmtH4501  | 20(10/10)  | 65.8   | TGTGCCCTGCAAAGATGGTAG  |
| 14 | 2, 3     | hmtL5061  | 20(10/10)  | 65.8   | AGCAGTTCTACCGTACAACC   |
| 15 | 2, 3     | hmtH5193  | 20(12/8)   | 62.9   | GTGTTAGTCATGTTAGCTTG   |
| 16 | 3        | hmtL5828  | 20(9/11)   | 67.3   | GAAAATCACCTCGGAGCTGG   |
| 17 | 3        | hmtH5993  | 20(10/10)  | 65.8   | TAAGGAGGCTTAGAGCTGTG   |
| 18 | 3        | hmtL6563  | 20(10/10)  | 65.8   | ACCTCAACACCACCTTCTTC   |
| 19 | 3        | hmtH6753  | 20(10/10)  | 65.8   | TGTGCTCACACGATAAACCC   |
| 20 | 3, 4     | hmtL7336  | 21(11/10)  | 67.3   | GATTTGAGAAGCCTTCGCTTC  |
| 21 | 3, 4     | hmtH7497  | 21(12/9)   | 65.8   | TTTGAAAAAGTCATGGAGGCC  |
| 22 | 4        | hmtL8080  | 20(10/10)  | 65.8   | TCTTGCACTCATGAGCTGTC   |
| 23 | 4        | hmtH8251  | 20(10/10)  | 65.8   | GCTATAGGGTAAATACGGGC   |
| 24 | 4        | hmtL8815  | 20(10/10)  | 65.8   | CTCATTTACACCAACCACCC   |
| 25 | 4        | hmtH9030  | 21(11/10)  | 67.3   | CCAATTAGGTGCATGAGTAGG  |
| 26 | 4, 5     | hmtL9611  | 20(10/10)  | 65.8   | TCCCACTCCTAAACACATCC   |
| 27 | 4, 5     | hmtH9819  | 21(11/10)  | 67.3   | GCCAATAATGACGTGAAGTCC  |
| 28 | 5        | hmtL10380 | 20(10/10)  | 65.8   | TCTGGCCTATGAGTGACTAC   |
| 29 | 5        | hmtH10598 | 21(11/10)  | 67.3   | GTTGAGGGTTATGAGAGTAGC  |
| 30 | 5        | hmtL11107 | 21(12/9)   | 65.8   | TTCACAGCCACAGAATAATC   |
| 31 | 5        | hmtH11381 | 20(10/10)  | 65.8   | AAGTGGAGTCCGTAAGAGAGG  |
| 32 | 5, 6     | hmtL11727 | 17(6/11)   | 62.9   | GCCACGGGCTTACATC       |
| 33 | 5, 6     | hmtH12111 | 20(10/10)  | 65.8   | AAACCCGGTAATGATGTCCGG  |
| 34 | 6        | hmtL12640 | 21(12/9)   | 65.8   | TCGTTACATGGTCCATCATAG  |
| 35 | 6        | hmtH12862 | 20(10/10)  | 65.8   | AAACCGATATCGCCGATACG   |
| 36 | 6        | hmtL13389 | 21(12/9)   | 65.8   | TCCATCATCCACAACCTTAAC  |
| 37 | 6        | hmtH13627 | 20(10/10)  | 65.8   | AAGCGAGGTTGACCTGTTAG   |
| 38 | 6, 7     | hmtL14130 | 20(10/10)  | 65.8   | TCTTCCCACTCATCCTAACC   |
| 39 | 6, 7     | hmtH14559 | 20(9/11)   | 67.3   | GATTGTTAGCGGTGTGGTCG   |
| 40 | 7        | hmtL14838 | 20(10/10)  | 65.8   | TCCAACATCTCCGCATGATG   |
| 41 | 7        | hmtH15153 | 21(11/10)  | 67.3   | CCCCTCAGAAATGATATTTGGC |
| 42 | 7        | hmtL15591 | 20(10/10)  | 65.8   | TTCGCCTACACAATTCTCCG   |
| 43 | 7, 8     | hmtH15912 | 20(10/10)  | 65.8   | TCTCCGGTTTACAAGACTGG   |
| 44 | 7, 8     | hmtL16365 | 20(9/11)   | 67.3   | GTCAAATCCCTTCTCGTCCC   |

8 fragments for complete mtDNA

## primers for HVSI

- (1) human-mitochondrial-strand-3'.  
(2) Primer length (nt) and (A+T/G+C).  
(3) Melting Temperature =  $1.46x[(A+T)+2x(G+C)]+22$

| To amplify the whole mtDNA in 8 fragment | Length | Sequencing primers for this fragment | Reactions |
|------------------------------------------|--------|--------------------------------------|-----------|
| 1- hmtL569/hmtH2941                      | 2412bp | 2, 4, 5, 6, 7, 9                     | 6         |
| 2- hmtL2797/hmtH5193                     | 2436bp | 8, 10, 11, 12, 13, 15                | 6         |
| 3- hmtL5061/hmtH7497                     | 2476bp | 14, 16, 17, 18, 19, 21               | 6         |
| 4- hmtL7336/hmtH9819                     | 2524bp | 20, 22, 23, 24, 25, 27               | 6         |
| 5- hmtL9611/hmtH12111                    | 2539bp | 26, 28, 29, 30, 31, 33               | 6         |
| 6- hmtL11727/hmtH14559                   | 2851bp | 32, 34, 35, 36, 37, 39               | 6         |
| 7- hmtL14130/hmtH112                     | 2590bp | 38, 40, 41, 42, 43, 1                | 6         |
| 8- hmtL15591/hmtH626                     | 1643bp | 44, 3                                | 2         |
|                                          |        | Total                                | 44        |
